# Supplementary material
Source: publisher figshare collection journal article supplement (https://gsajournals.figshare.com/ndownloader/files/36988909)
Supplement: Supplementary file 1 [file 36988909]

**Table S1.** Plasmids used in this work.

| Plasmid | Construct | Source | Relevant Figures |
| --- | --- | --- | --- |
| PSAB1144 | *gpa-4Δ6*p::*mks-5::rfp* | This work | 2C, 2D, S2A, 3C, 3D, 4D |
| PSAB1280 | *gpa-4Δ6*p:: *gfp1-10* | This work | 2C, 2D, S2A, 3C, 3D, 4D |
| PSAB1281 | *gpa-4Δ6*p::*odr-10::tagRFP* | This work | 2E, 2F, S2B |
| PSAB1282 | *gpa-4Δ6*p::*tagRFP* | This work | 6A, 6B, 6C, 6D |
| PSAB1283 | *gpa-4Δ6*p::*tir1::SL2::mScarlet* | This work | 4A, 4B, 6E |
